# Supplementary material
Source: publisher figshare collection journal article supplement (https://acs.figshare.com/ndownloader/files/4681444)
Supplement: Supplementary file 1 [file 4681444]

**Supporting Information:** Experimental details: 2.2 mM solution of **1** and 2.7 mM solution of **2** were prepared by dissolving 61mg of **1** and 75mg of **2** in 1 ml Millipore-Q water. The EAS of these dispersions were recorded using a Varian Cary 1E UV-VIS spectrophotometer and after achieving the desired dilution, the solutions were transferred to the AUC cells with aluminum double-sector centerpieces together with water as a reference. SV boundaries were recorded with a step size of 10  $\mu\text{m}$  in continuous mode at 46,000 RPM and  $20\text{ }^{\circ}\text{C} \pm 0.1$ , employing a Beckman Optima XL-A AUC, An-60 Ti rotor, until all material was pelleted. For each sample 100 scans were recorded of which 50 SV scans were included in the enhanced van Holde-Weischet (vHW) and the continuous distribution of sedimentation coefficients ( $C(s)$ ) analysis as implemented in *UltraScan*.<sup>18</sup>
